# Supplementary material for: Validation of the Arabic Maternal Breastfeeding Evaluation Scale (MBFES-A) among Lebanese women
Source: PubMed Central journal article supplement (PMC8379770; doi:10.1186/s13006-021-00409-w), 2021-08-21
Supplement: 13006_2021_409_MOESM1_ESM.pdf [file 13006_2021_409_MOESM1_ESM.pdf]

## مقياس تقييم الأم للرضاعة الطبيعية

إسم الأم: \_\_\_\_\_

**التوجيهات:** لكل من الإفادات التالية، الرجاء أن تحددى كم توافقين أو لا توافقين بإختيارك الجواب الأقرب ملائمة مع رأيك:

| أوافق بشدة | أوافق | لا رأي لدي | لا أوافق | أوافق بشدة |                                                        |
|------------|-------|------------|----------|------------|--------------------------------------------------------|
|            |       |            |          |            | 1. مع الرضاعة الطبيعية أحسست بالسعادة الداخلية         |
|            |       |            |          |            | 2. وقت الرضاعة هو وقت خاص لي مع طفلي                   |
|            |       |            |          |            | 3. طفلي لا يهتم للرضاعة الطبيعية                       |
|            |       |            |          |            | 4. طفلي يحب الرضاعة الطبيعية                           |
|            |       |            |          |            | 5. كان عبء علي أن أكون مصدر الغذاء الرئيسي لطفلي       |
|            |       |            |          |            | 6. أحسست بالقرب الشديد من طفلي عندما كنت أرضعه         |
|            |       |            |          |            | 7. طفلي كان متلهفا للرضاعة                             |
|            |       |            |          |            | 8. الرضاعة كانت مرهقة جسديا                            |
|            |       |            |          |            | 9. كان من المهم لي أن أكون قادرة على الإرضاع           |
|            |       |            |          |            | 10. خلال فترة الرضاعة كان نمو طفلي ممتاز               |
|            |       |            |          |            | 11. أنا وطفلي عملنا سويا لكي تكون الرضاعة سلسة         |
|            |       |            |          |            | 12. الرضاعة كانت تجربة جيدة لي في الرعاية كأم          |
|            |       |            |          |            | 13. خلال فترة الرضاعة كنت أشعر بأني مقيدة كل الوقت     |
|            |       |            |          |            | 14. الرضاعة كانت تهدئ طفلي عندما يمزج أو يبكي          |
|            |       |            |          |            | 15. الرضاعة كانت تعلي من نفسياتي                       |
|            |       |            |          |            | 16. كنت راضية جدا لأنه كان بإمكانني إنتاج الغذاء لطفلي |
|            |       |            |          |            | 17. الرضاعة جعلتني أشعر بأني أم جيدة                   |
|            |       |            |          |            | 18. لقد كنت أستمتع فعلا بالرضاعة                       |
|            |       |            |          |            | 19. خلال الرضاعة كنت أقلق بشأن إسترجاع شكل جسمي        |
|            |       |            |          |            | 20. الرضاعة جعلتني أشعر بثقة أكبر كأم                  |

|  |  |  |  |  |                                                           |
|--|--|--|--|--|-----------------------------------------------------------|
|  |  |  |  |  | 21. زاد وزن طفلي بشكل جيد على حليبي                       |
|  |  |  |  |  | 22. الرضاعة جعلت طفلي يحس بالإطمئنان أكثر                 |
|  |  |  |  |  | 23. كان سهلاً علي أن أوفق بين رضاعة طفلي و نشاطاتي الأخرى |
|  |  |  |  |  | 24. الرضاعة جعلتني أشعر كالبقرة                           |
|  |  |  |  |  | 25. طفلي لم يكن مرتاحاً خلال الرضاعة                      |
|  |  |  |  |  | 26. الرضاعة كانت رائعة بالنسبة لي                         |
